# Supplementary material for: All-printed and stretchable organic electrochemical transistors using a hydrogel electrolyte
Source: Royal Society of Chemistry journal article supplement (doi:10.1039/d2nr06731e), 2023-01-01
Supplement: d2nr06731e1.pdf [file d2nr06731e1.pdf]

Electronic Supplementary Material (ESI) for Nanoscale.

This journal is © The Royal Society of Chemistry 2022

**Supporting Information for**  
**All-printed and Stretchable Organic Electrochemical Transistors Using Hydrogel**  
**Electrolyte**

Chi-hyeong Kim,<sup>a</sup> Mona Azimi,<sup>a</sup> Jiaxin Fan,<sup>a</sup> Harini Nagarajan,<sup>a</sup> Meijing Wang,<sup>a</sup> and Fabio Cicoira<sup>a\*</sup>

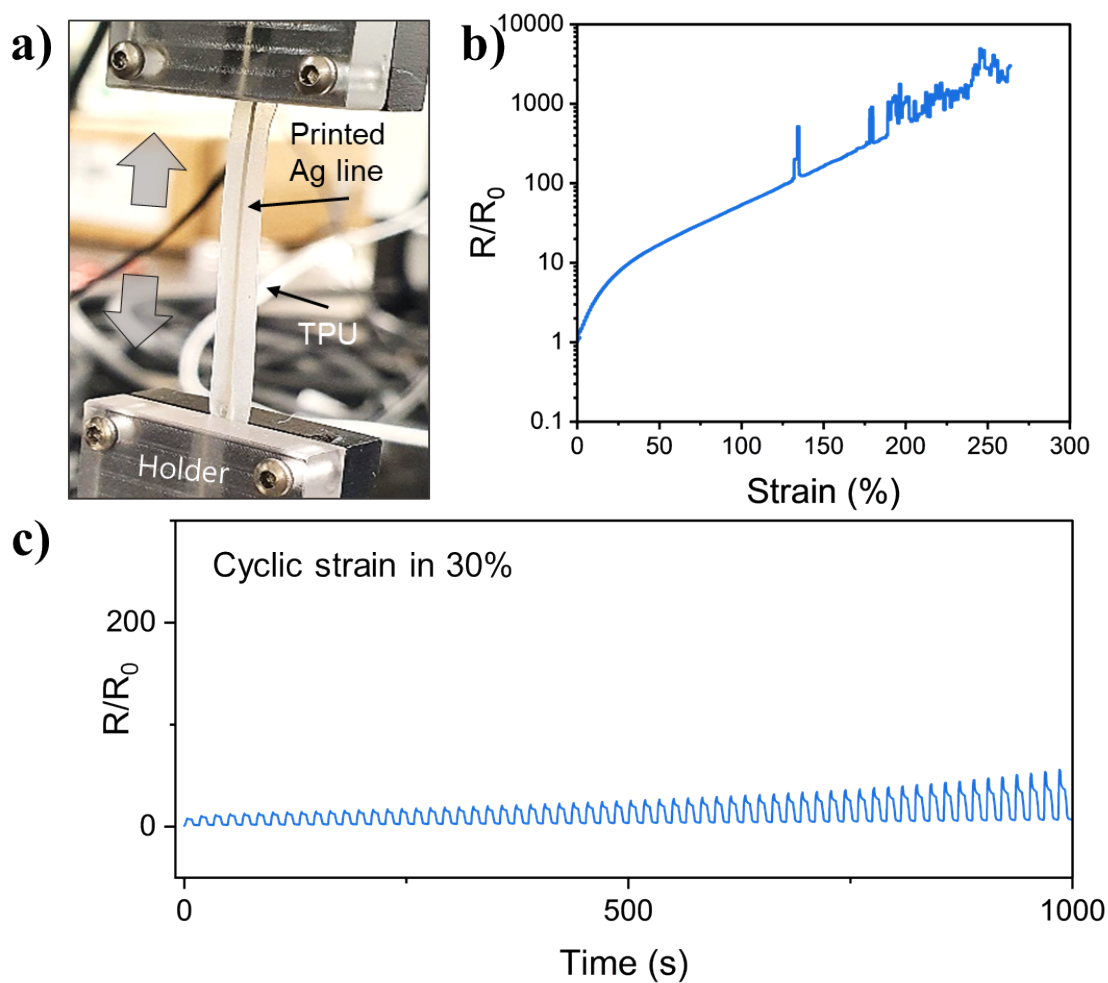

**Fig. S1** Electromechanical test of a printed stretchable Ag electrode. a) Digital photo of the sample. b) Normalized resistance ( $R$ ) with respect to the initial resistance ( $R_0$ ) at 0% while stretching until break. c) 30% cyclic tensile strain test. 10 mA was applied in b) and c)

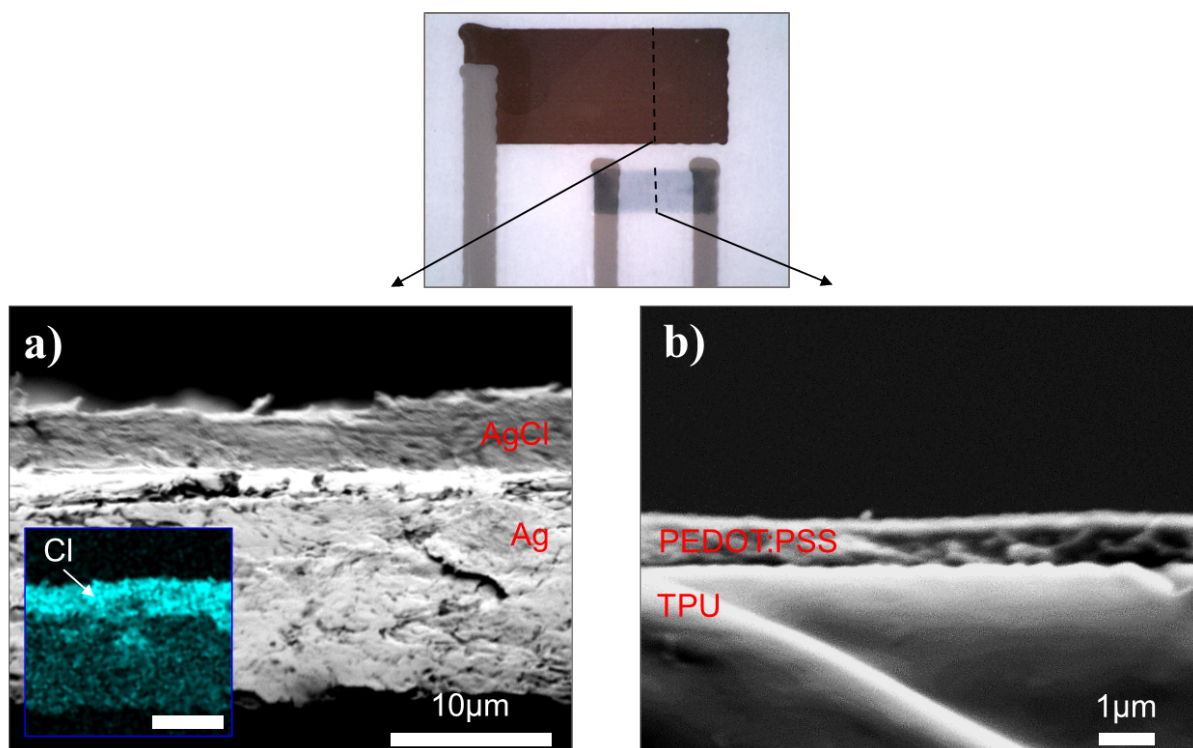

**Fig. S2** FE-SEM cross-sectional images a) printed Ag/AgCl gate. The inset shows Cl element in AgCl layer by Energy-dispersive X-ray spectroscopy (scale bar: 10 μm). b) printed PEDOT:PSS channel on TPU substrate.

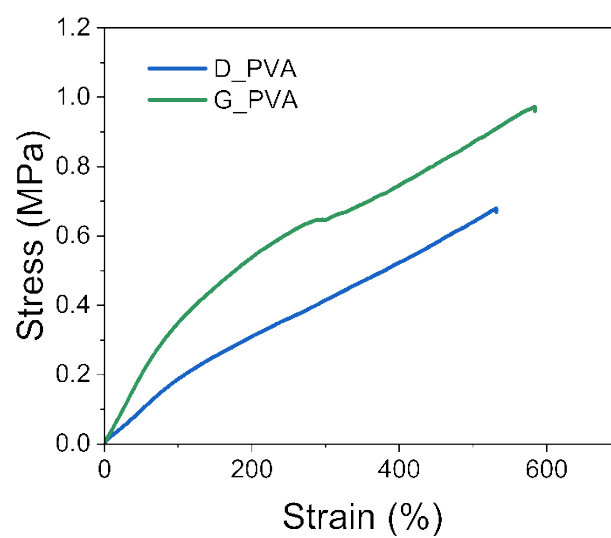

**Fig. S3** Stress-strain curve of hydrogel tensile test.

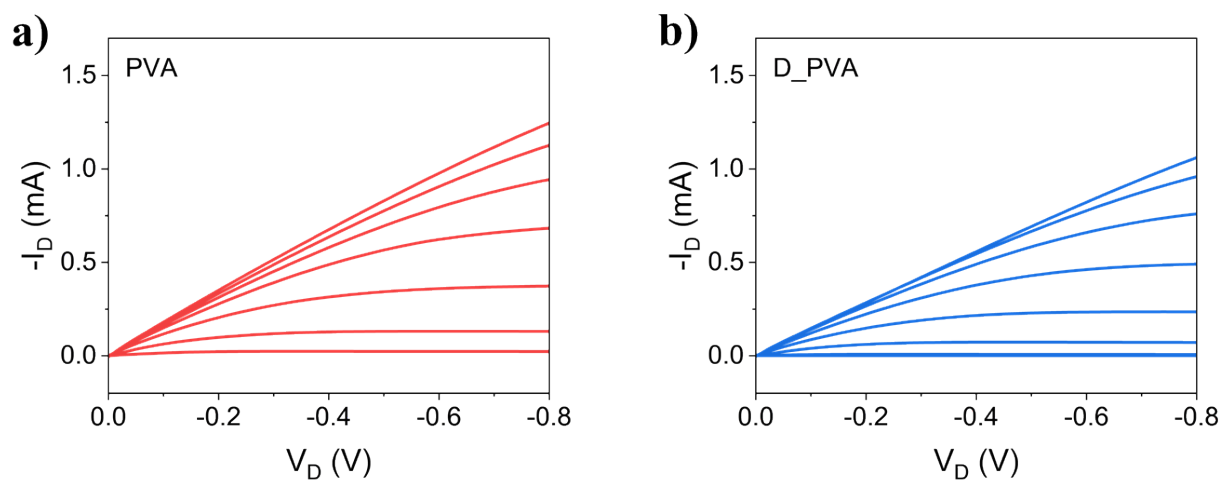

**Fig. S4** Output curves of a) PVA and b) D\_PVA OECT. ( $V_G$  from -0.6 to 0.8 V in 0.2 V steps)

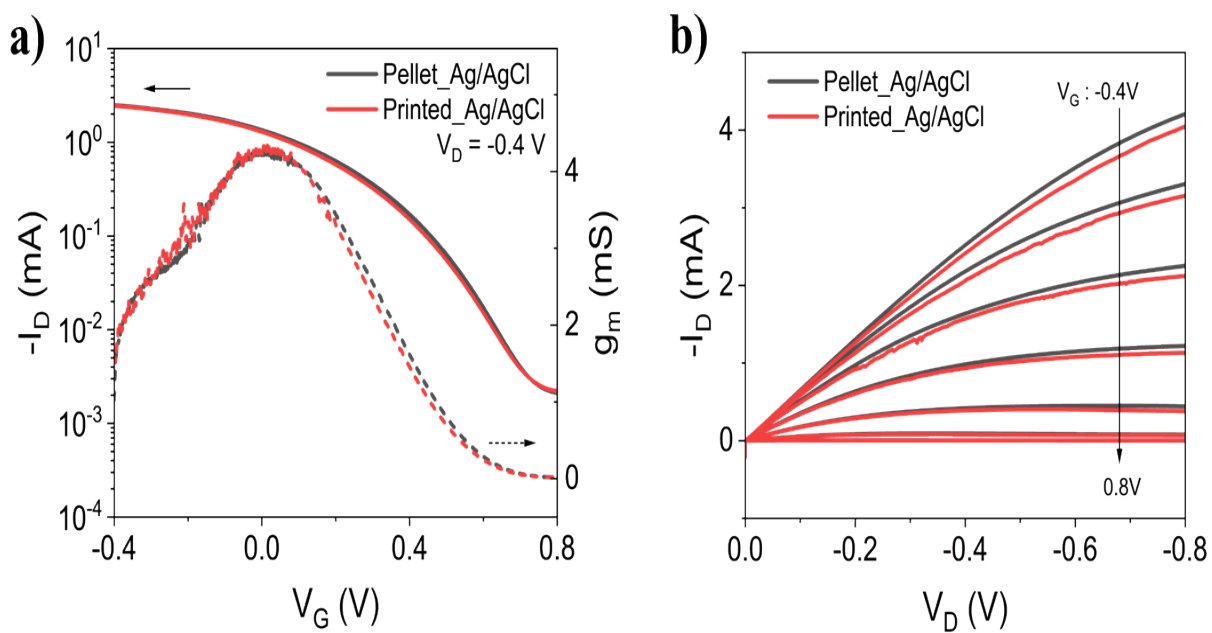

**Fig. S5** Comparison of I-V characteristics measured with a pellet and a printed Ag/AgCl gate a) transfer curves and b) output curves. The dimension of Ag/AgCl pellet (Warner Instruments) is 4mm diameter and 1mm thickness. The electrolyte is a 0.1 M NaCl solution.

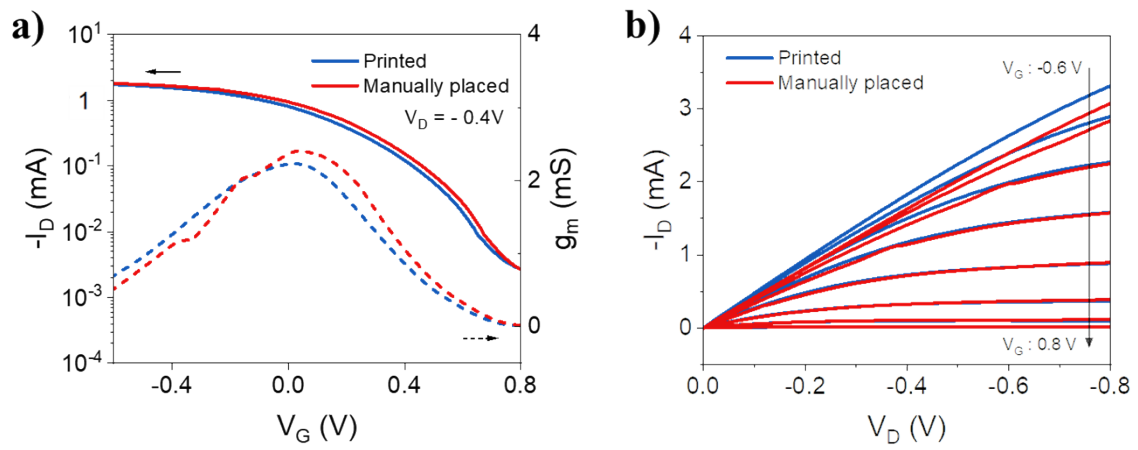

**Fig. S6** Comparison of I-V characteristics measured with printed and manually attached PVA hydrogel electrolytes on the OEETs a) transfer curves and b) output curves.

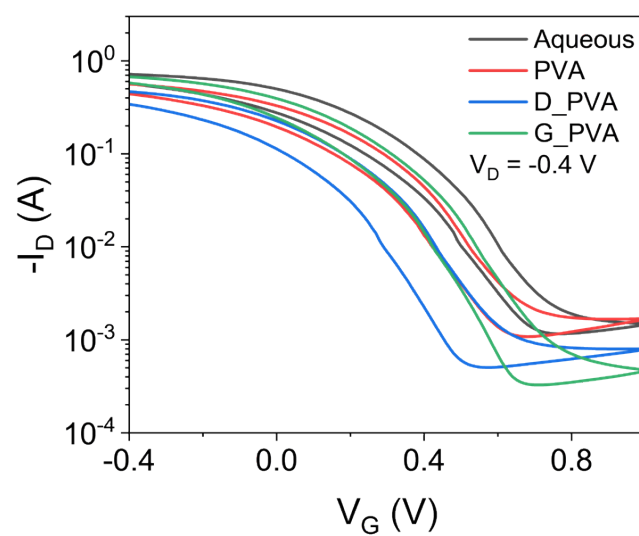

**Fig. S7** Transfer curves with 4 types of electrolytes, including backward sweep of gate voltage

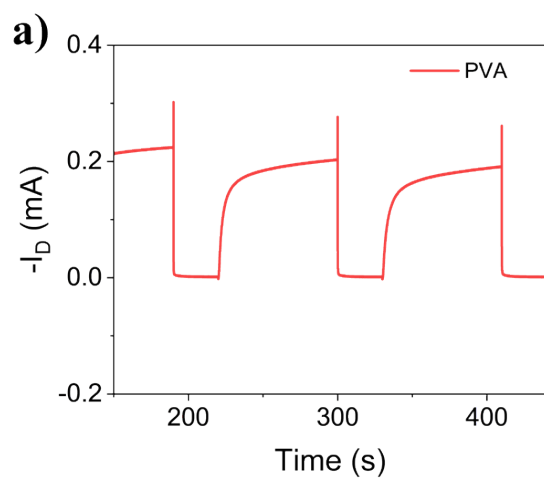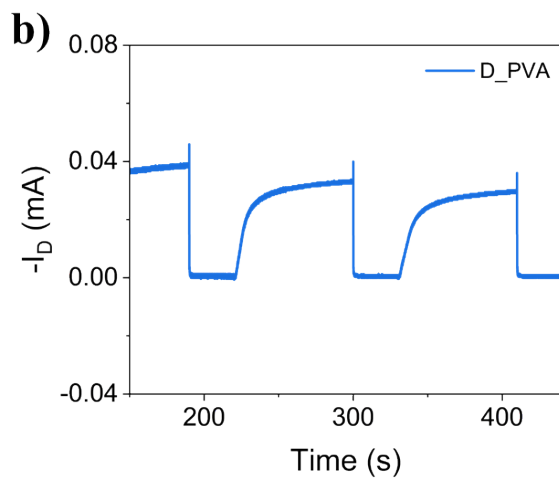

**Fig. S8** Transient responses of a) PVA a) and b) D\_PVA OECTs. ( $V_D = -0.4$  V and  $\Delta V_G = 0.7$  V)

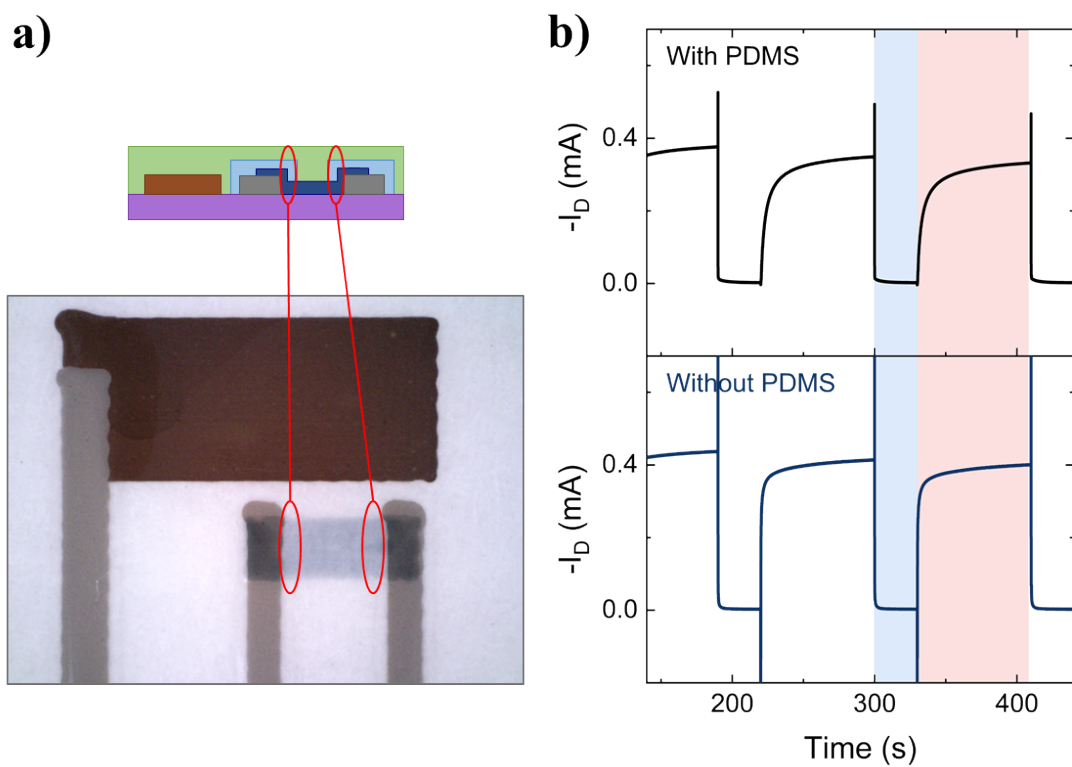

**Fig. S9** a) A scheme and a microscopic image of the OECT, indicating PDMS covering the PEDOT:PSS layer. b) Comparison of transient responses between the aqueous electrolyte-gated OECT with and without PDMS cover. The blue and red area indicate on-to-off and off-to-on responses, respectively.  $V_D = -0.4$  V and 0.7 V gate pulses were applied.

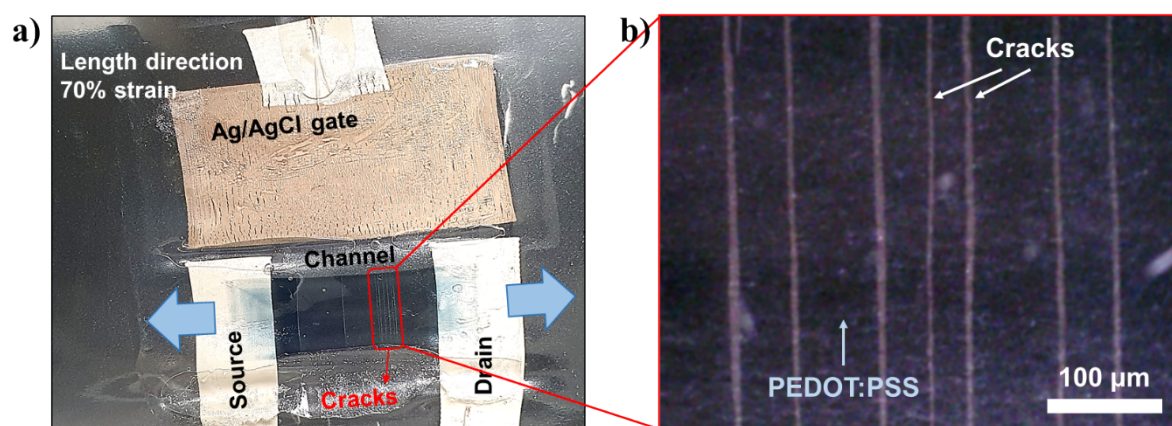

**Fig. S10** a) A digital photo of a stretched OEET in length direction at 70%. b) A microscopic image of micro-cracks on PEDOT:PSS channel.

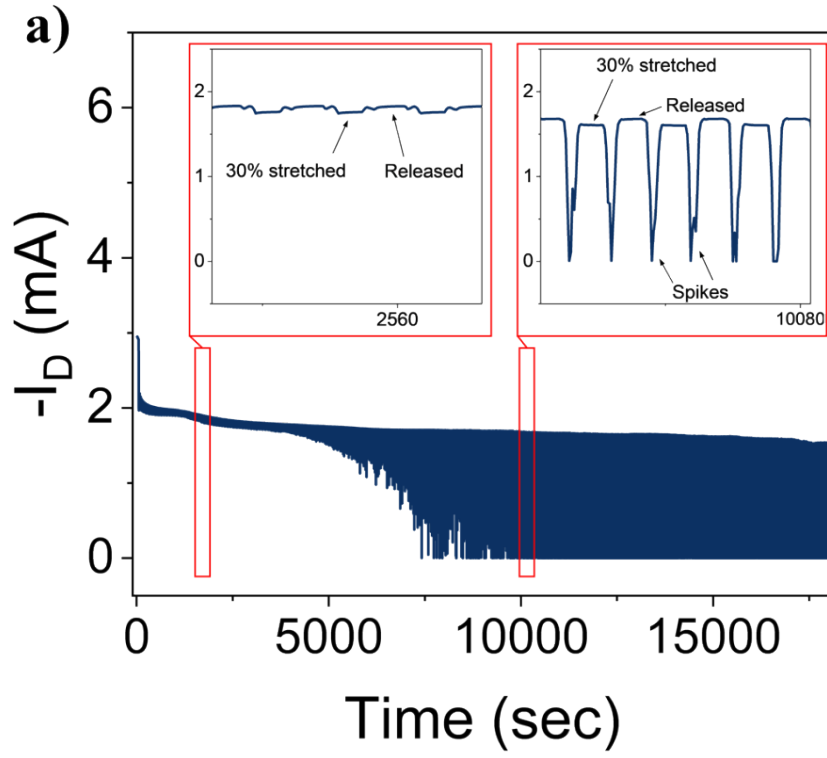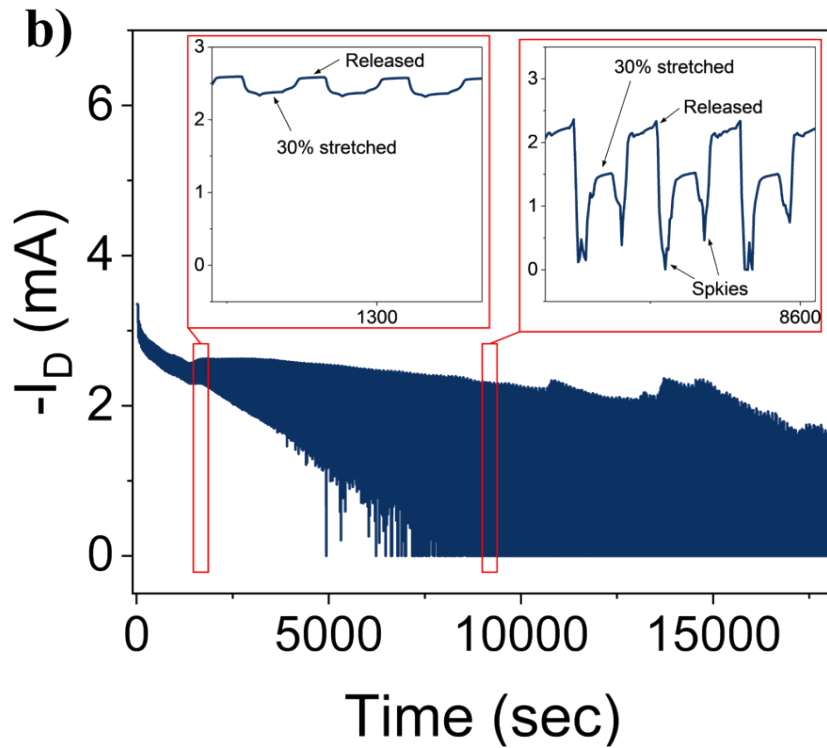

**Fig. S11** The drain current measured under 30% cyclic strains in a) the length direction and b) the width direction. The device was biased at  $V_D = -0.4$  V and  $V_G = 0$  V. The insets are magnified plots.
